# Supplementary material for: Investigation of inverse emulsion assisted controlled release of polyacrylamides for enhanced oil recovery
Source: Royal Society of Chemistry journal article supplement (doi:10.1039/c9ra00465c), 2019-01-01
Supplement: c9ra00465c1.pdf [file c9ra00465c1.pdf]

# Supporting Information

## Investigation of Inverse Emulsion Assisted Controlled Release of Polyacrylamides for Enhanced Oil Recovery

Zheyu Liu,<sup>\*a,b</sup> Shruti Mendiratta,<sup>b</sup> Xin Chen,<sup>a</sup> Jian Zhang,<sup>c</sup> and Yiqiang Li,<sup>\*a</sup>

<sup>a</sup>College of Petroleum Engineering, China University of Petroleum (Beijing), Beijing 102249, PR China

<sup>b</sup>Chemical and Petroleum Engineering, University of Calgary, Calgary, AB T2N 1N4, Canada.

<sup>c</sup>China National Offshore Oil Corporation Research Institute, CNOOC, Beijing 100028, PR China

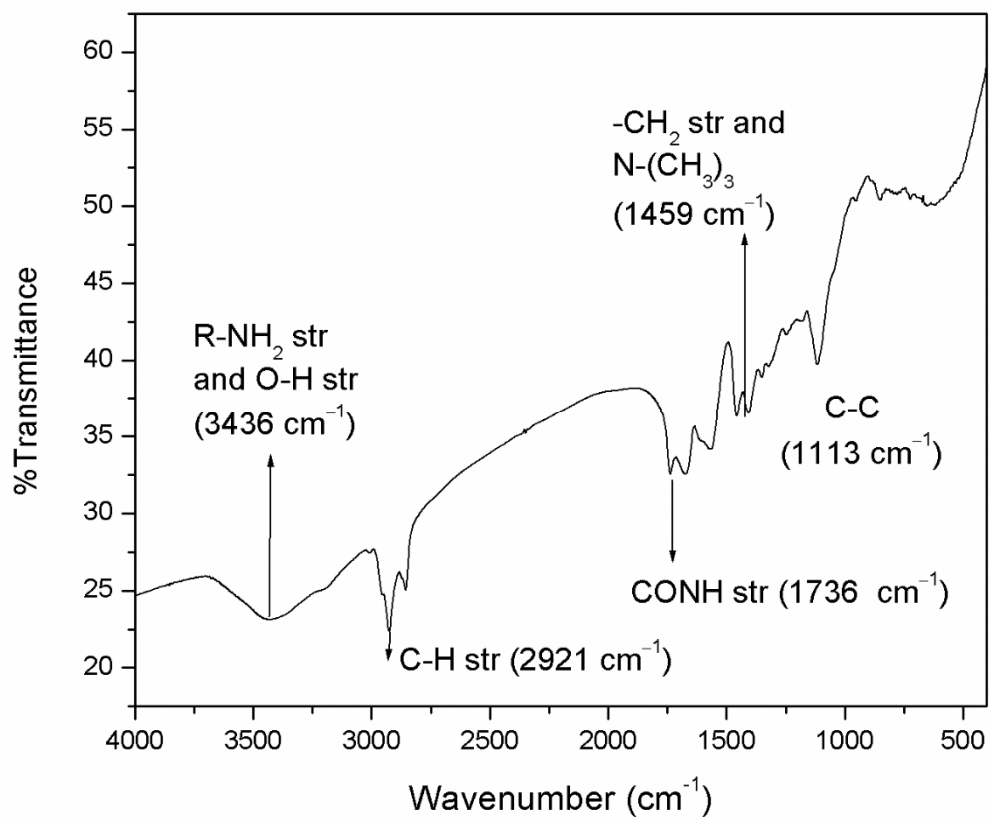

**Fig. S1** FTIR spectrum of GF-1 polymer.

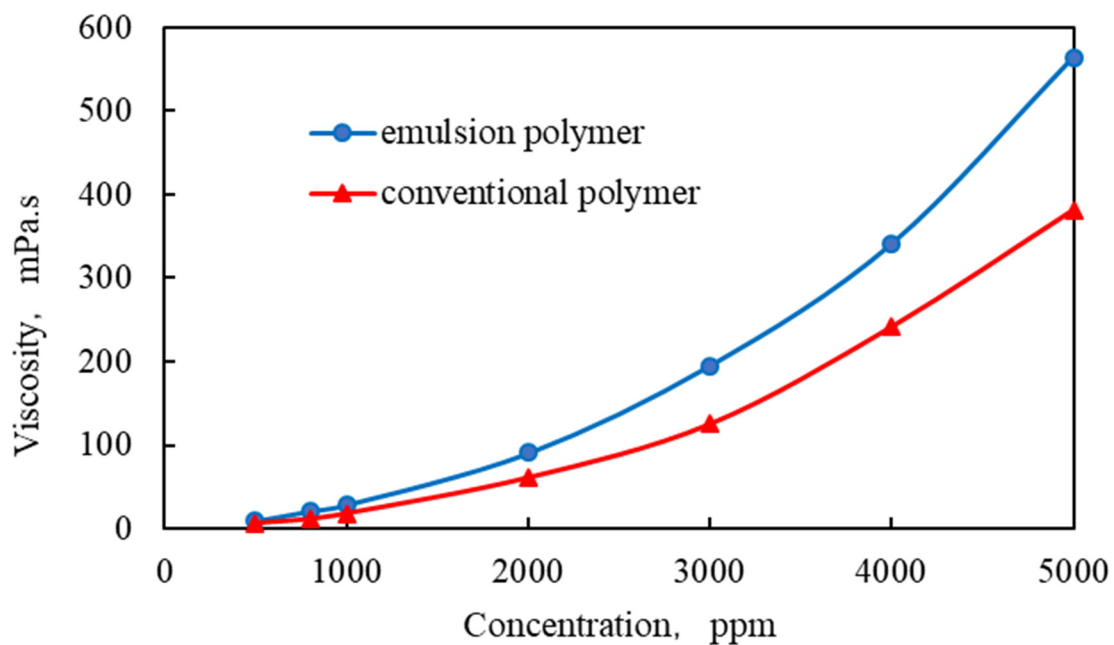

**Fig. S2** Concentration-viscosity curve of emulsion polymer (containing **GF-1**) and conventional polymer.

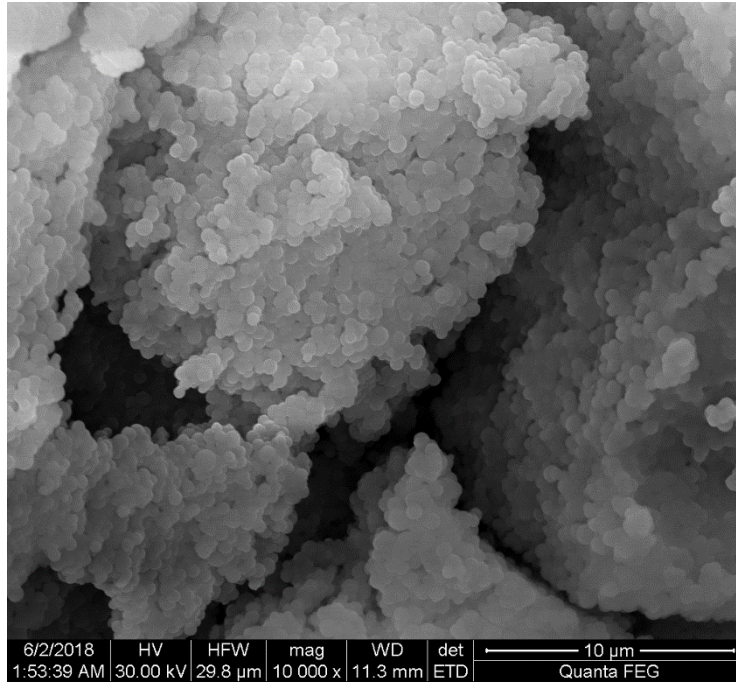

**Fig. S3** SEM image of emulsion polymer (GF-1), dried powder.

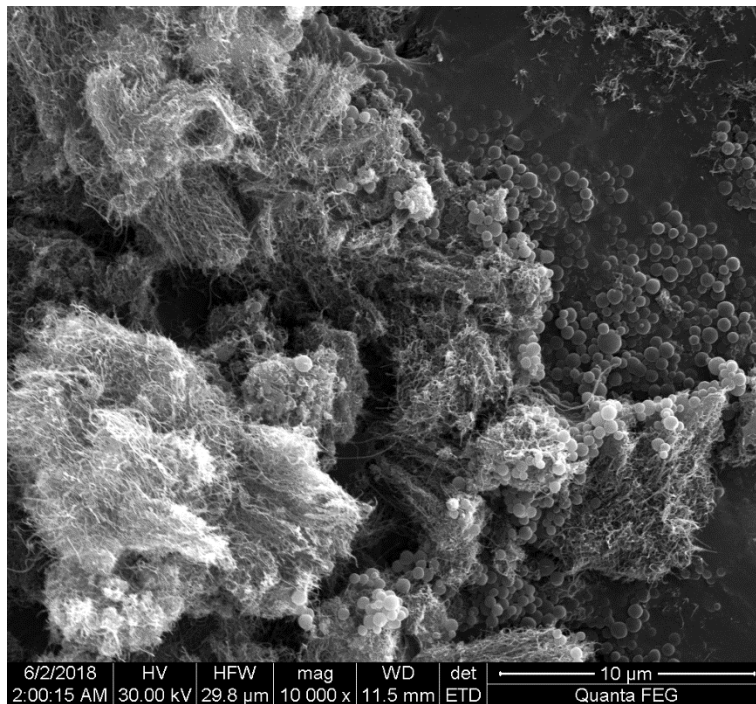

**Fig. S4** SEM image of emulsion polymer (GF-1), dried powder, imaged in different area.
